# Supplementary material for: Functional verification of the JmLFY gene associated with the flowering of Juglans mandshurica Maxim
Source: PeerJ. 2023 Mar 7;11:e14938. doi: 10.7717/peerj.14938 (PMC10000305; doi:10.7717/peerj.14938)
Supplement: Supplemental Information 1 [file peerj-11-14938-s001.xlsx]

## Sheet: Table 2
strain	Number of rosette leaves	mean value	flower bud formation time		flowering time		plant height		Number of secondary branches		Number of stem leaves
WT1	15		30		37		25.9		4		6
WT1	14		31		38		25.5		5		5
WT1	13		33		37		26.7		4		7
WT1	14	0.83666	32	1.14018	38	0.547723	27.2	1.12339	5	0.83666	4	1.14018
WT1	13	13.8	31	31.4	37	37.4	24.3	25.92	3	4.2	5	5.4
lfy(1)	22		41		49		29.4		12		16
lfy(2)	23		40		50		29.8		13		17
lfy(3)	25		42		51		28.8		14		16
lfy(4)	23	1.14018	42	1.14018	50	0.83666	29.5	0.458258	11	1.14018	17	0.83666
lfy(5)	24	23.4	43	41.6	49	49.8	30	29.5	12	12.4	18	16.8
L23（1）	10		23		30		24.3		3		5
L23（2）	10		24		29		27.2		4		4
L23（3）	11		22		28		26.1		5		6
L23（4）	10	0.447214	23	0.83666	28	0.83666	25	1.32552	4	0.707107	3	1.14018
L23（5）	10	10.2	22	22.8	29	28.8	27.3	25.98	4	4	4	4.4
L28(1)	9		23		29		26.3		5		4
L28(2)	9		24		28		25.9		4		4
L28(3)	10		23		30		26.8		3		5
L28(4)	9	0.894427	23	0.447214	30	0.83666	27.1	0.482701	5	0.83666	3	0.707107
L28(5)	11	9.6	23	23.2	29	29.2	26.2	26.46	4	4.2	4	4
C7(1)	18		37		40		25.2		7		11
C7(2)	19		38		41		24.9		7		12
C7(3)	19		37		42		26.3		8		11
C7(4)	20	0.83666	38	0.547723	42	0.83666	25.8	0.636396	9	0.894427	12	0.547723
C7(5)	18	18.8	37	37.4	41	41.2	26.3	25.7	7	7.6	11	11.4
	mean value	significant	mean value	significant	mean value	significant	mean value	significant	mean value	significant	mean value	significant
	13.8	c	31.4	c	37.4	c	25.92	b	4.2	c	5.4	c
	23.4	a	41.6	a	49.8	a	29.5	a	12.4	a	16.8	a
	10.2	d	22.8	d	28.8	d	25.98	b	4	c	4.4	cd
	9.6	d	23.2	d	29.2	d	26.46	b	4.42	c	4	d
	18.8	b	37.4	b	41.2	b	25.7	b	7.6	b	11.4	b
		error bar		error bar		error bar		error bar		error bar		error bar
		0.84		1.14		0.55		1.12		0.84		1.14
		1.14		1.14		0.84		0.46		1.14		0.84
		0.44		0.84		0.84		1.33		0.71		1.14
		0.89		0.44		0.84		0.48		0.84		0.71
		0.84		0.55		0.84		0.64		0.89		0.55

## Sheet: Fig.10
L		relative transcript level	error bar
	L1	1.04167	0.337306
	L2	0.560779	0.0770276
	L4	0.603123	0.180489
	L5	1.66981	0.420169
C
		relative transcript level	error bar
	C1	0.652428	0.394773
	C3	1.38913	0.0770276
	C4	2.29466	0.401183

## Sheet: Fig.11-AP1
expression quantity
Duncana,b
strain	N	subset
		1	2	3	4
1	3	1.01
2	3	1.69667	1.69667
4	3		2.08333
3	3			6.17			tissue	expression quantity
5	3				7.91667		WT	1.00851
significant		0.101056	0.333136	1	1		lfy	1.69582
							L23	6.17137
a. Harmonic mean sample size is used = 3.000。							L28	2.08735
b. Alpha = .05。							C7	7.91748
							error bar
							0.164749
							0.584372
							0.651493
							0.278256
							0.468988

## Sheet: Fig.11-SOC1
expression quantity
Duncana,b
strain	N	subset
		1	2	3	4
2	3	0.24					tissue	expression quantity
1	3	1.00667					WT	1.00676
4	3		2.81333				lfy	0.242407
3	3			7.11333			L23	7.11428
5	3				13.6567		L28	2.81433
significan		0.0500298	1	1	1		C7	13.6567
a. Harmonic mean sample size is used = 3.000。							error bar
b. Alpha = .05。							0.138778
							0.0332966
							0.275886
							0.459566
							0.766921

## Sheet: Fig.11-FT
expression quantity
Duncana,b
strain	N	subset
		1	2	3	4		tissue	expression quantity
1	3	1					WT	1.00231
2	3	1.12667					lfy	1.12349
3	3		4.13				L23	4.12825
4	3			8.19667			L28	8.19617
5	3				9.88		C7	9.88232
significan		0.864574	1	1	1
a. Harmonic mean sample size is used = 3.000。
b. Alpha = .05。							error bar
							0.0846287
							0.330215
							0.280917
							1.84607
							0.557169

## Sheet: Fig.11-PI
expression quantity
Duncana,b
strain	N	subset					tissue	expression quantity
		1	2	3	4		WT	1.00068
2	3	0.903333					lfy	0.903691
1	3	0.996667					L23	1.70612
4	3		1.35				L28	1.34984
3	3			1.70667			C7	3.10289
5	3				3.10333
significan		0.499101	1	1	1
a. Harmonic mean sample size is used = 3.000。
b. Alpha = .05。
							error bar
							0.0450401
							0.0813483
							0.0661619
							0.220422
							0.267845
